# Supplementary material for: Facile synthesis of size-controllable gold nanoflowers on carbon nanotube sheets as high-performance flexible SERS sensors
Source: Royal Society of Chemistry journal article supplement (doi:10.1039/d4nj03687e), 2024-11-29
Supplement: d4nj03687e1.pdf [file d4nj03687e1.pdf]

*Supporting Information*

**Facile Synthesis of Size-Controllable Gold Nanoflowers on  
Carbon Nanotube Sheets as High-Performance Flexible  
SERS Sensors**

Zuo Xiao<sup>1</sup>, Xuhuan Li<sup>1</sup>, Rong Yang<sup>1</sup>, Weichen Fang<sup>1</sup>, Xiaodong Shen<sup>1</sup>, Yang Cao<sup>\*,2</sup> and  
Wenbo Xin<sup>\*,1</sup>

<sup>1</sup>College of Materials Science and Engineering, Nanjing Tech University, No.30 Puzhu  
South Road, Jiangbei New Area, Nanjing, Jiangsu 211816, China

<sup>2</sup>College of Emergency Management, Nanjing Tech University, No. 30 Puzhu South  
Road, Jiangbei New Area, Nanjing, Jiangsu 211816, China

\*Corresponding Author: [ycao@njtech.edu.cn](mailto:ycao@njtech.edu.cn); [xinwenbo@njtech.edu.cn](mailto:xinwenbo@njtech.edu.cn)

---

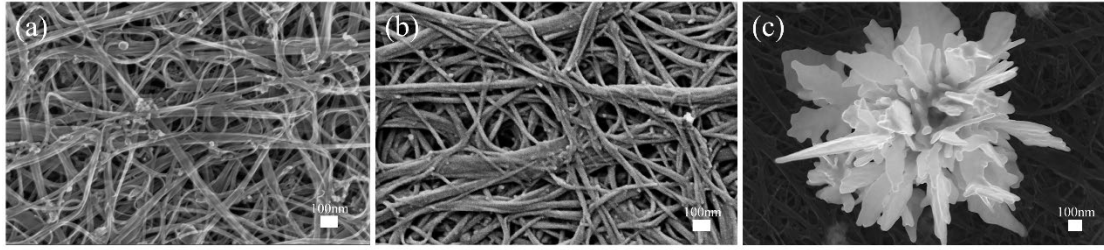

**Figure S1.** SEM images of (a) CNT sheets and (b) PEI-CNT hybrids at high magnification. (c) Representative SEM image of a single AuNF on CNT sheet.

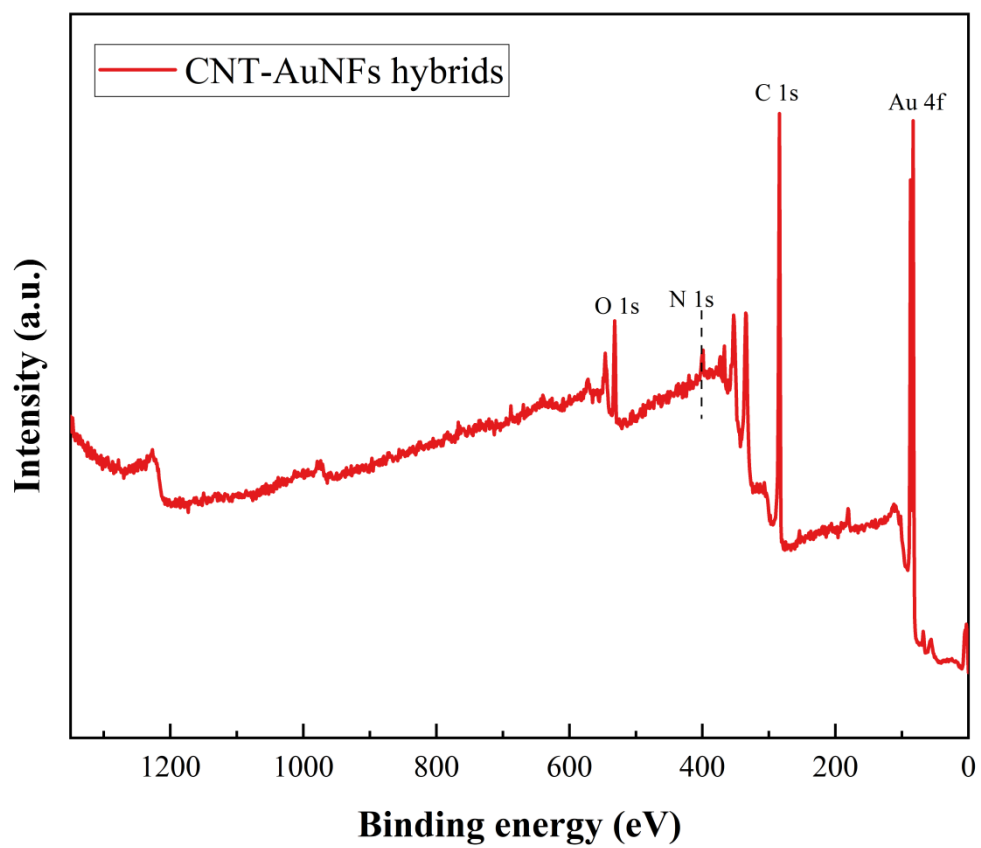

**Figure S2.** XPS survey spectra of the CNT-AuNFs hybrids showing the peaks of Au 4f, C 1s, N 1s, and O 1s.

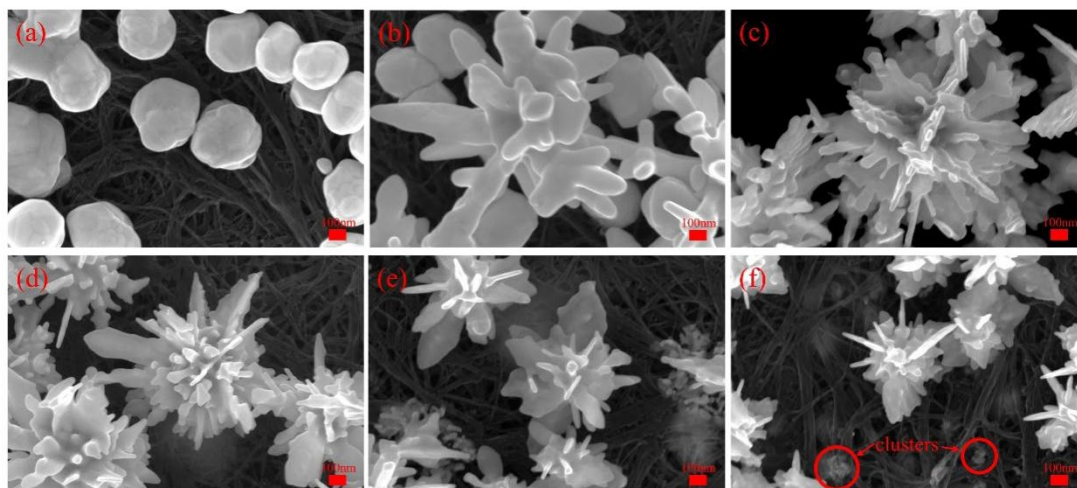

**Figure S3.** Representative SEM images of gold nanocrystals synthesized on CNT sheets with various AA concentrations at high magnification. (a) 0, (b) 0.8, (c) 2, (d) 4, (e) 8 and (f) 16 mM AA.

(a)

| AA Concentration (mM) | Au NFs Diameter (nm) | Au NPs Diameter (nm) |
|-----------------------|----------------------|----------------------|
| 0                     |                      | 374.1 ± 6.5          |
| 0.8                   | 1418.5 ± 83.1        | 301.5 ± 2.2          |
| 2                     | 1269.0 ± 31.4        |                      |
| 4                     | 954.4 ± 13.2         |                      |
| 8                     | 791.5 ± 59.6         |                      |
| 16                    | 528.5 ± 14.3         |                      |

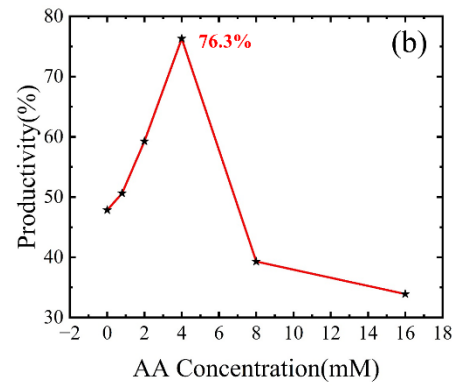

**Figure S4.** (a) Size distribution and (b) productivity statistics of gold nanocrystals synthesized on CNT sheets with various AA concentrations.

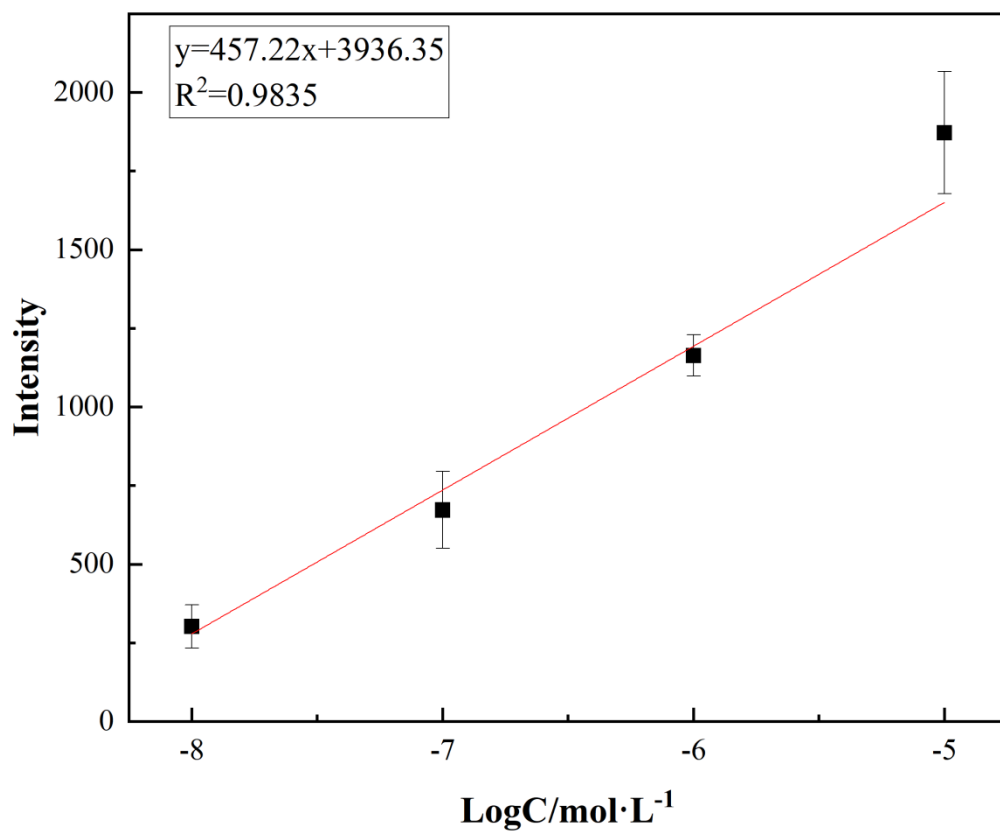

**Figure S5.** Plot of the linear relationship between the intensity at 1155 cm<sup>-1</sup> and different concentrations of CR solutions.

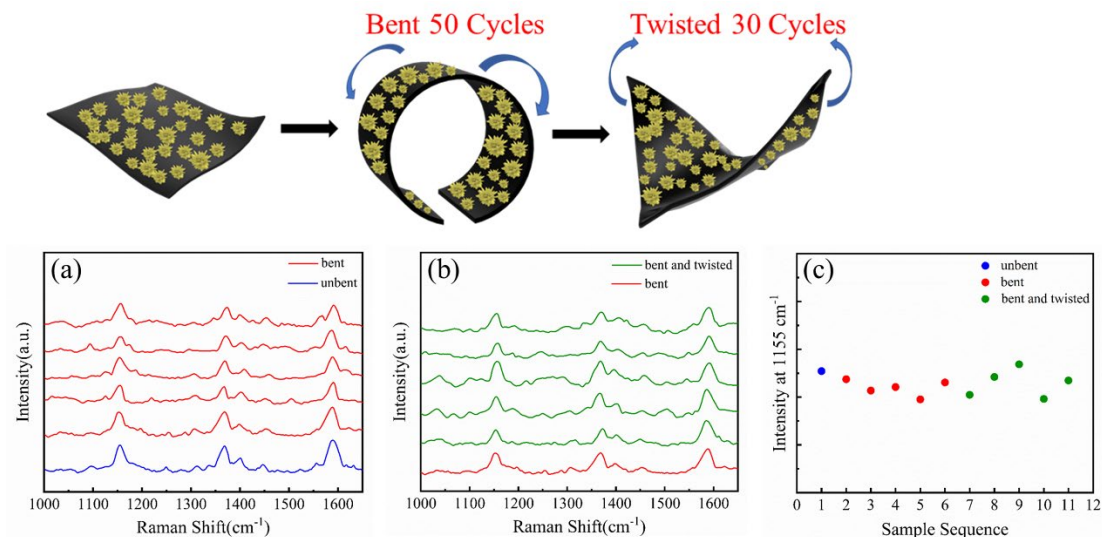

**Figure S6.** SERS performance of CNT sheet-Au nanoflowers after (a) 50 bending cycles and (b) then 30 twisting cycles for  $1 \times 10^{-7}$  M CR. (c) Intensity distribution at  $1155 \text{ cm}^{-1}$  after two mechanical stimuli.

**Table S1.** RSD values of predominant peaks of CR at  $1 \times 10^{-7}$  M

| Analyte                    | CR( $1 \times 10^{-7}$ M) |       |       |       |       |
|----------------------------|---------------------------|-------|-------|-------|-------|
| Peaks ( $\text{cm}^{-1}$ ) | 1155                      | 1371  | 1400  | 1449  | 1591  |
| RSD (%)                    | 18.7%                     | 22.0% | 28.2% | 29.1% | 19.7% |
